# Supplementary material for: Highly Orientated Sericite Nanosheets in Epoxy Coating for Excellent Corrosion Protection of AZ31B Mg Alloy
Source: MDPI journal article supplement (doi:10.3390/nano13162310), 2023-08-11
Supplement: s1 [file s1]

## Supplementary Information

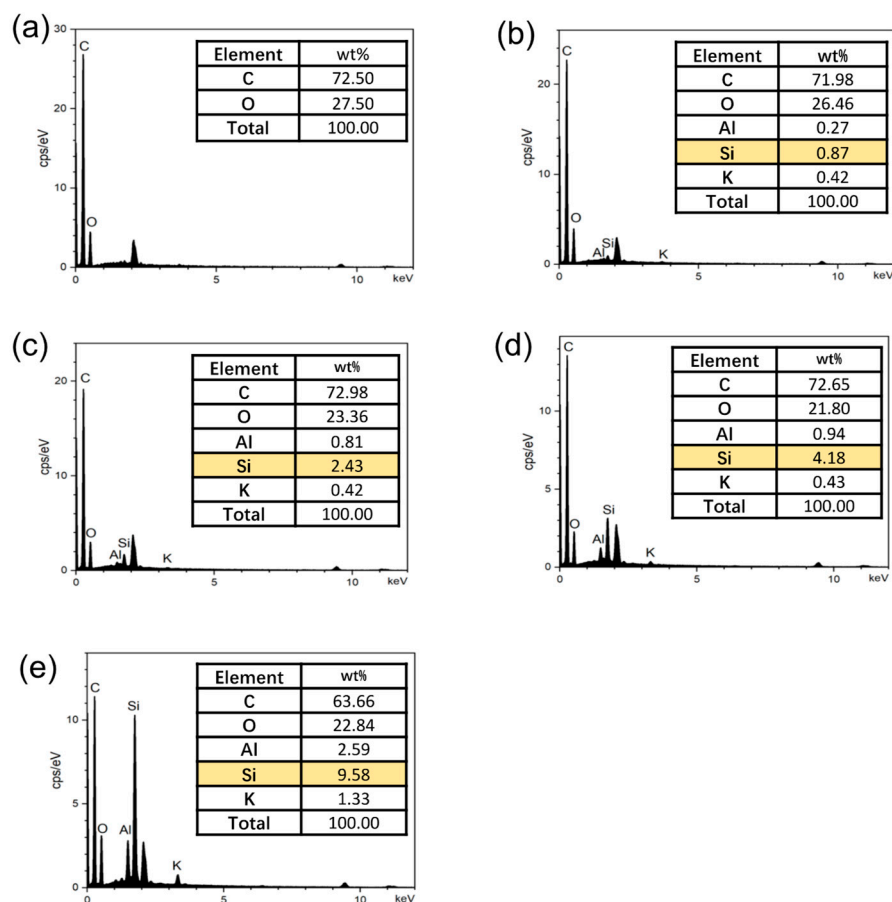

Figure S1. EDS spectra and related elemental concentration obtained from the surface of different samples: (a) E, (b) ES-1, (c) ES-2, (d) ES-4, and (e) ES-6.
